# Supplementary material for: Effect of trans Fatty Acid Intake on LC-MS and NMR Plasma Profiles
Source: PubMed Central journal article supplement (PMC3726671; doi:10.1371/journal.pone.0069589), 2013-07-29

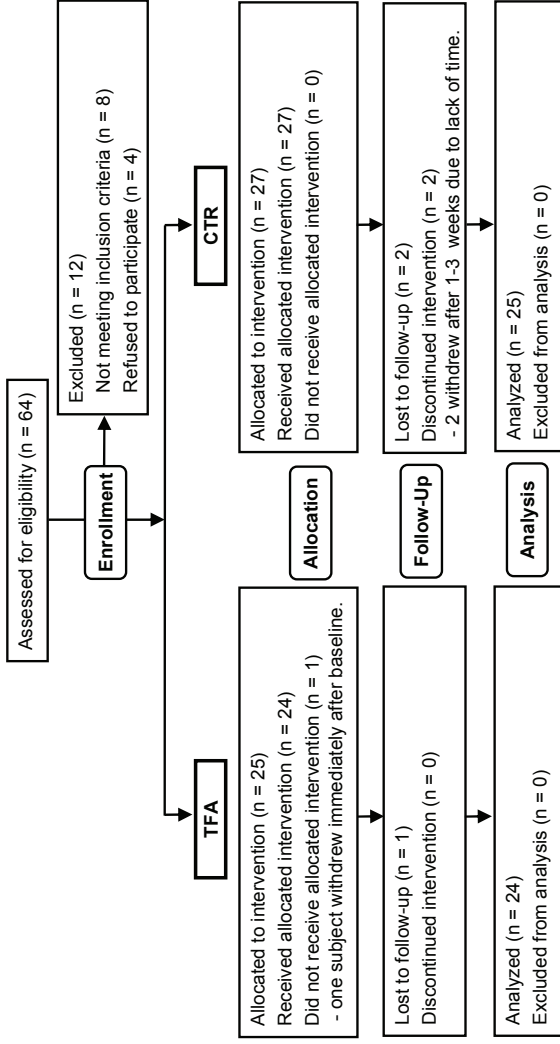

Supplement: pone.0069589.s001.pdf [file pone.0069589.s001.pdf]
